# Supplementary material for: Evolution of fast root gravitropism in seed plants
Source: PubMed Central journal article supplement (PMC6677796; doi:10.1038/s41467-019-11471-8), 2019-08-02
Supplement: 41467_2019_11471_MOESM1_ESM.pdf [file 41467_2019_11471_MOESM1_ESM.pdf]

## **Supplementary Information**

### **Evolution of fast root gravitropism in seed plants**

Zhang et al.

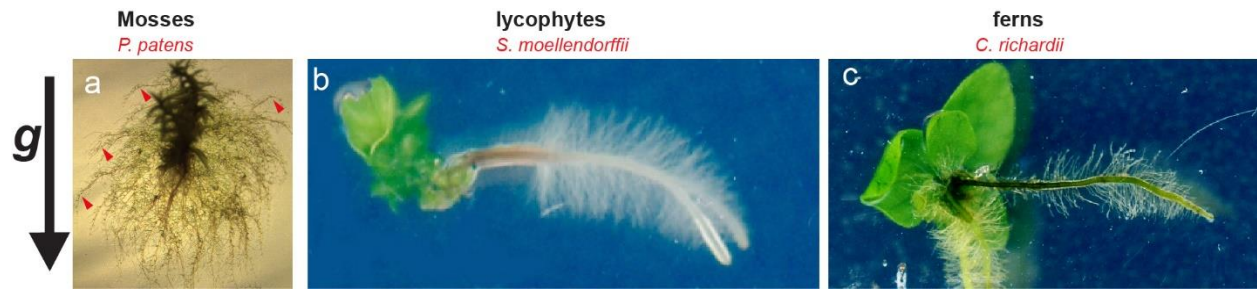

**Supplementary Figure 1. Slow root gravitropism in the basal vascular plant lineages. a-c,** The gravitropism analysis of the rhizoid of moss *P. patens* (a) and the roots of the basal vascular plants lycophyte *S. moellendorffii* (b) and the fern *C. richardii* (c) after a 90° plant reorientation for 5 days.

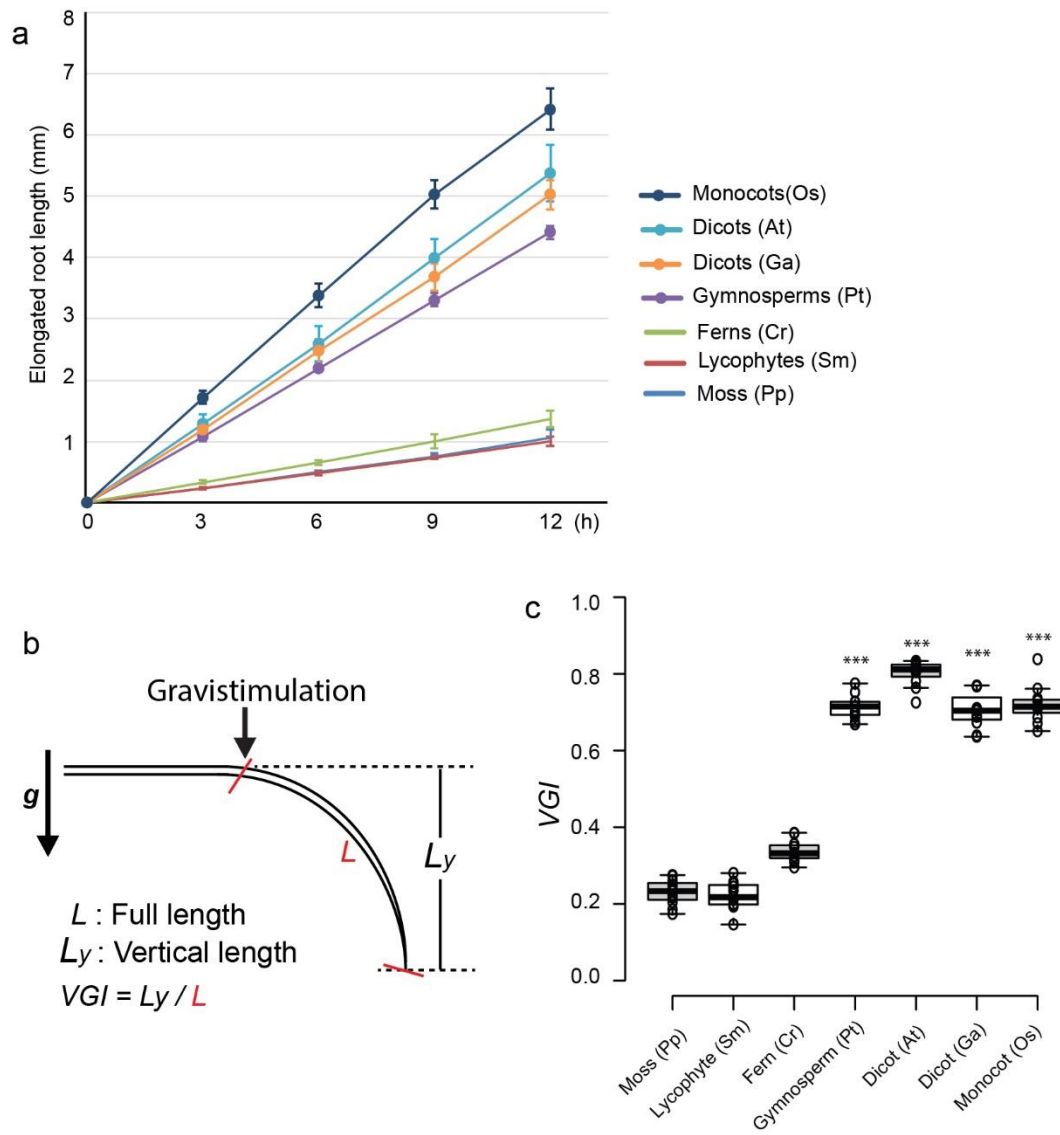

**Supplementary Figure 2. The quantification of the rhizoid/roots with the vertical growth index.** **a**, Quantifications of the growth rates for the rhizoid of the moss and the roots of these representative vascular plants ( $n = 8$  roots, graph shows mean length  $\pm$  SD). **b**, The schematic diagram showing the quantification of gravitropism by analyzing the vertical growth index (VGI) of rhizoid/roots with almost the same elongated length ( $L$ ) after the gravistimulation. **c**, Quantification of the rhizoid/root gravitropism of the diverse plant species with the VGI (as explained in **b**;  $n \geq 10$  roots). Center lines show the medians; box limits indicate the 25th and 75th percentiles as determined by R software; whiskers extend 1.5 times the interquartile range from the 25th and 75th percentiles, outliers are represented by dots. Student's  $t$ -test, \*\*\* denotes  $P < 0.001$ ,

compared with the basal vascular plant lycophyte (Sm) or ferns (Cr), respectively. Source data are provided as a Source Data file.

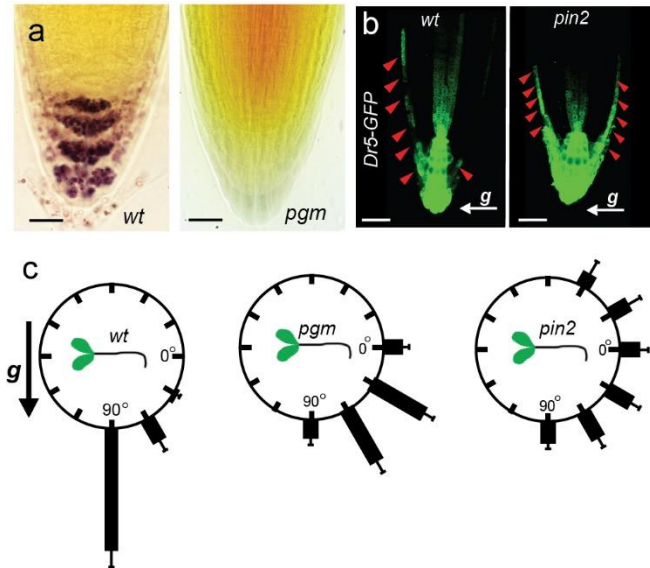

**Supplementary Figure 3. The amyloplasts and auxin transporter PIN2 are essential for root gravitropism.** **a**, Starch granules (visualized by Lugol's staining) accumulate within the root apex of wild-type *A. thaliana* (left), while starch granule accumulation is impaired in the *pgm-1* mutant (right). **b**, After gravistimulation for 30 min, activity of the synthetic auxin responsive marker *DR5::GFP* revealed asymmetric auxin distribution in the wild-type *A. thaliana* (left), whereas defects in auxin redistribution were observed in the *pin2* loss-of-function mutant (right). Scale bars, 20  $\mu$ m in **a** and **b**. **c**, In contrast to the wild type (left), the *pgm-1* (middle) and *pin2* (right) mutants showed impaired root gravitropism after a 90° reorientation of the seedlings for 6 h. Each gravity-stimulated root was assigned to one of 12, 30° sectors. The length of each bar represents the mean percentages  $\pm$  S.D. of seedlings showing the same direction of root growth of three independent experiments ( $n \geq 30$  roots).

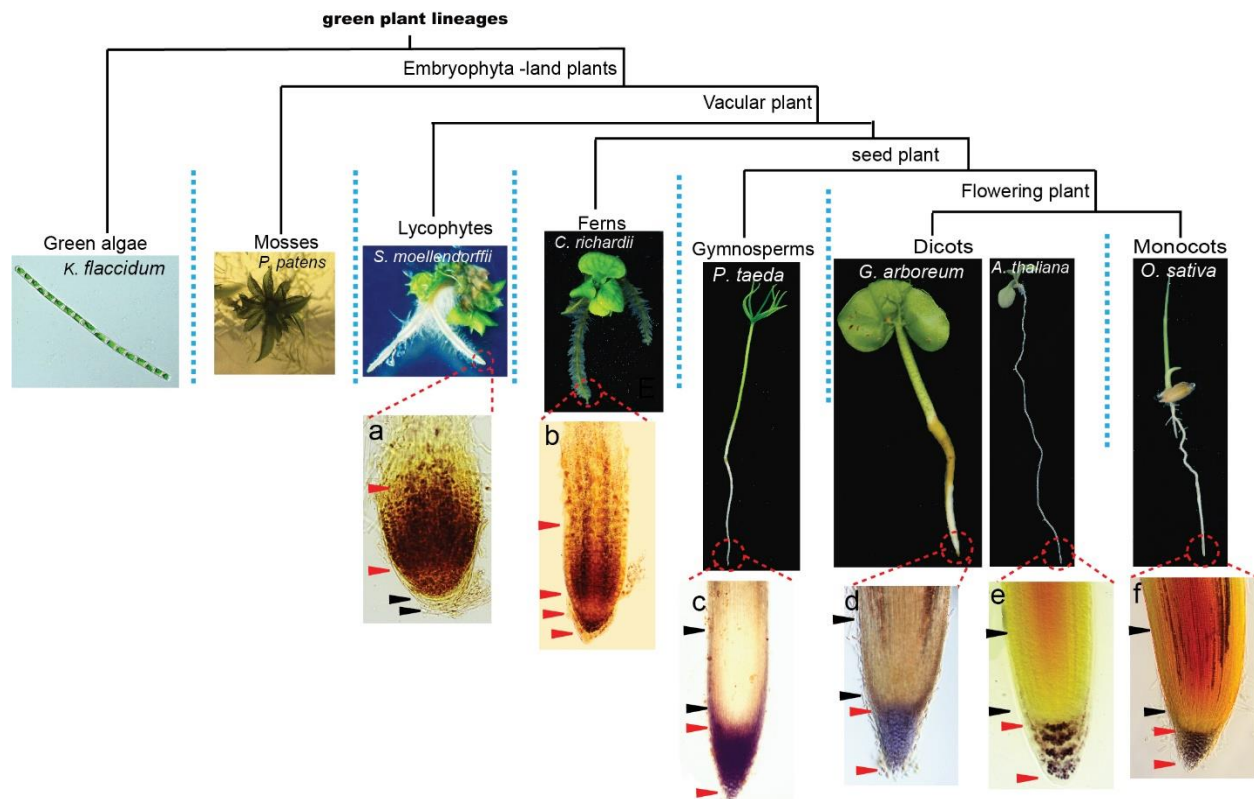

**Supplementary Figure 4. Exclusive root apex-specific amyloplast location in the seed plants. a-f,** Lugol's staining of the roots from the vascular plants *S. moellendorffii* (lycophyte), *C. richardii* (fern), *P. taeda* (gymnosperm), *G. arboreum* and *A. thaliana* (dicots), and *O. sativa* (monocot). The black arrows indicate the zones lacking starch granules (amyloplasts), and the red arrows indicate the zones containing starch granules.

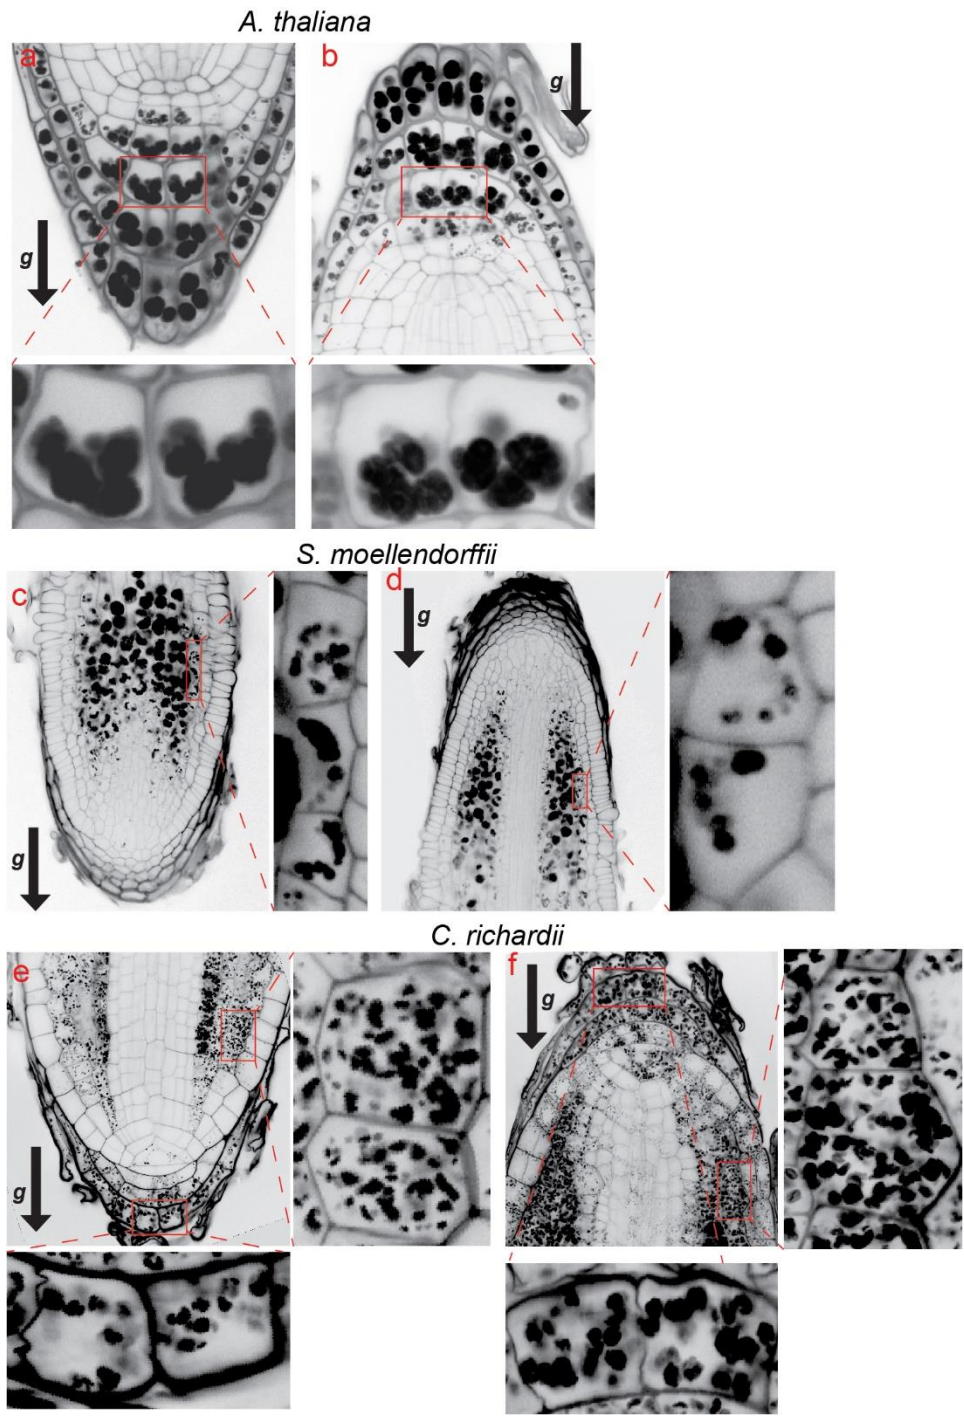

**Supplementary Figure 5. Amyloplast sedimentation analysis in the roots of flowering plant *A. thaliana*, lycophyte *S. moellendorffii* and fern *C. richardii*. a-b, mPS-PI staining of the roots from the flowering plant *A. thaliana* showing the amyloplast localization in the root caps before (a) and after a 180° reorientation for 1h (b). c-f, mPS-PI staining of the roots from the lycophyte *S.***

*moellendorffii* and fern *C. richardii* roots showing the amyloplast localization before (**c, e**) and after a 180° reorientation of the seedlings for 6h (**d, f**).



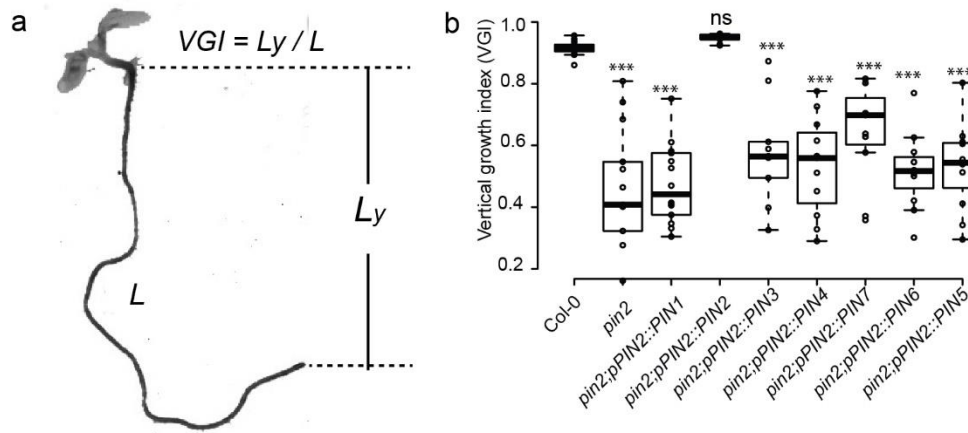

**Supplementary Figure 6. The functional specificity of *PIN2* in mediating fast root gravitropism.** **a, b,** Quantification of the vertical growth index (VGI, as explained in **a**) of the transgenic lines in Fig. 3b-e ( $n \geq 10$  roots). Center lines show the medians; box limits indicate the 25th and 75th percentiles as determined by R software; whiskers extend 1.5 times the interquartile range from the 25th and 75th percentiles, outliers are represented by dots. Student's *t*-test, \*\*\* denotes  $P < 0.001$  and ns denotes  $P > 0.05$ , compared with the *Col-0*, respectively. Source data are provided as a Source Data file.

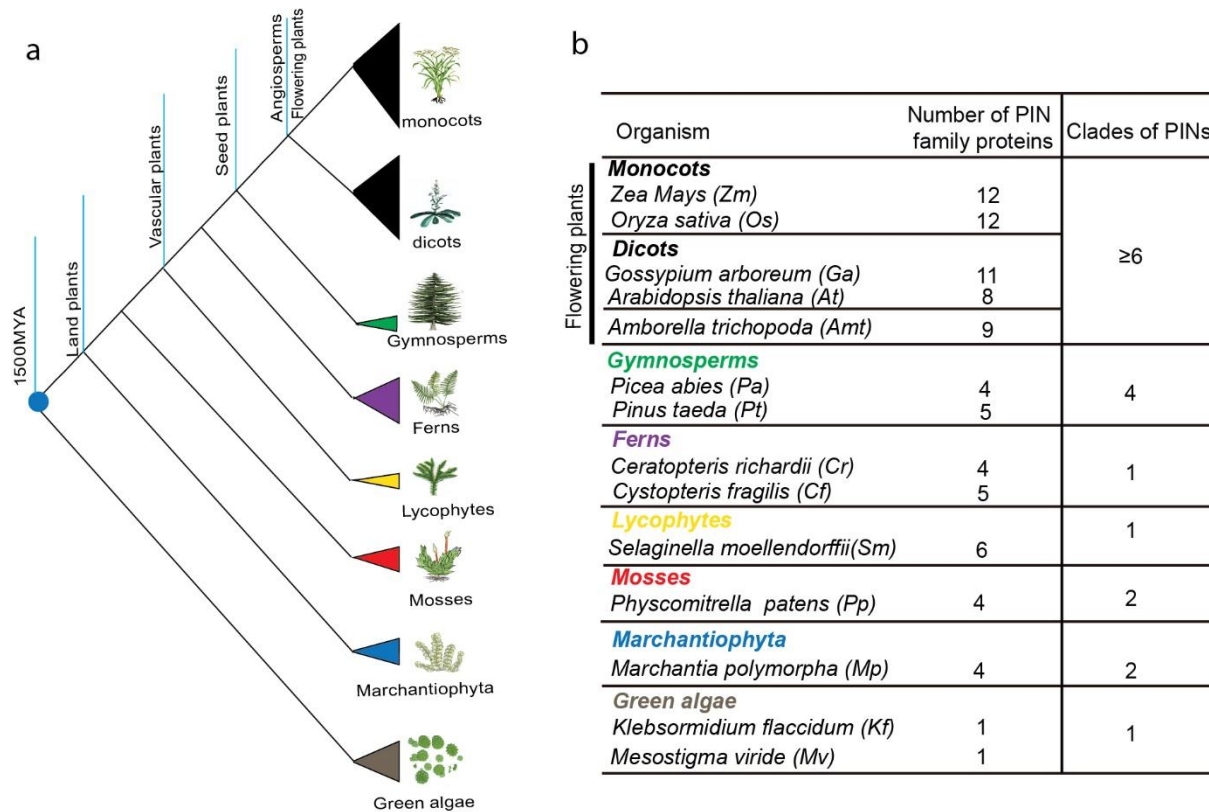

**Supplementary Figure 7. Evolution and origin of the *PIN* genes.** **a**, Phylogenetic tree showing the evolutionary relationships between plant lineages. **b**, The number of *PIN* proteins in various organisms. There are substantially more *PIN* proteins in the flowering plants than in the other plant lineages (*i.e.*, lycophytes, ferns, gymnosperms, mosses, and green algae). The right column shows the substantially more clades of *PIN* members in seed plants than other plant lineage according to the phylogenetic tree in the Supplementary Fig. 8.

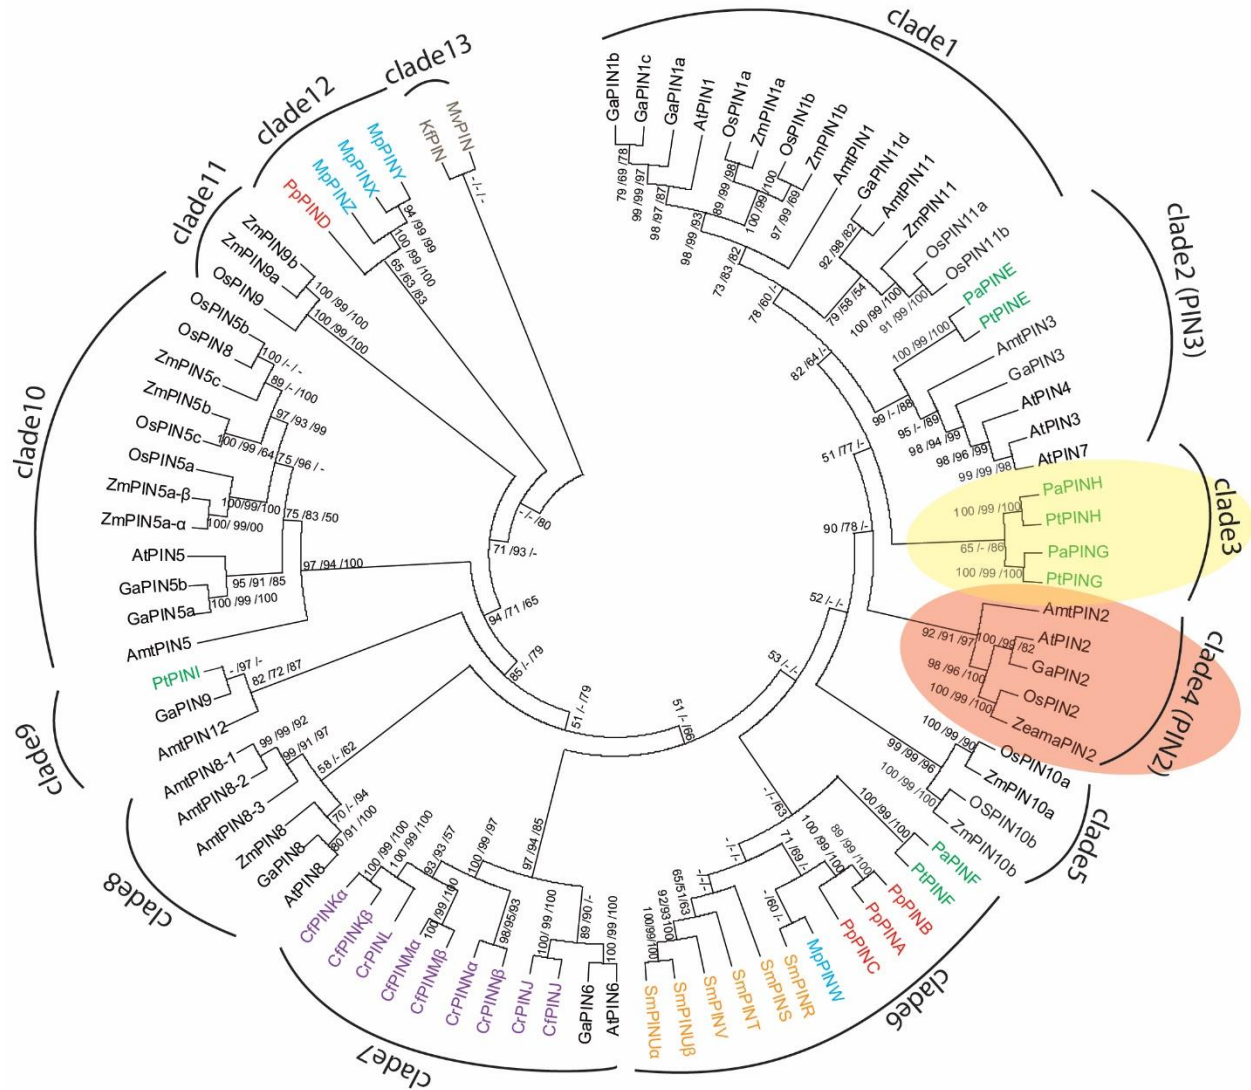

**Supplementary Figure 8. Phylogenetic analysis of the plant PIN family.** The phylogenetic tree was divided into 13 clades. The red dashed line divides the PINs into two types: canonical PINs and noncanonical PINs. Phylogenetic analysis was performed using the neighbor-joining/maximum-parsimony/maximum-likelihood methods with full-length protein sequences. Bootstrap values are shown on the branch points. Mv, *Mesostigma viride*; Kf, *Klebsormidium flaccidum*; Mp, *Marchantia polymorpha*; Pp, *Physcomitrella patens*; Sm, *Selaginella moellendorffii*; Cr, *Ceratopteris richardii*; Cf, *Cystopteris fragilis*; Pt, *Pinus taeda*; Pa, *Picea abies*; Amt, *Amborella trichopoda*; At, *Arabidopsis thaliana*; Ga, *Gossypium arboreum*; Os, *Oryza sativa*; Zm, *Zea mays*.

The blue colour indicates the marchantiophyte PINs, the red colour indicates the moss PINs, the yellow colour indicates the lycophyte PINs, the purple colour indicates the fern PINs, and the green colour indicates the gymnosperm PINs.

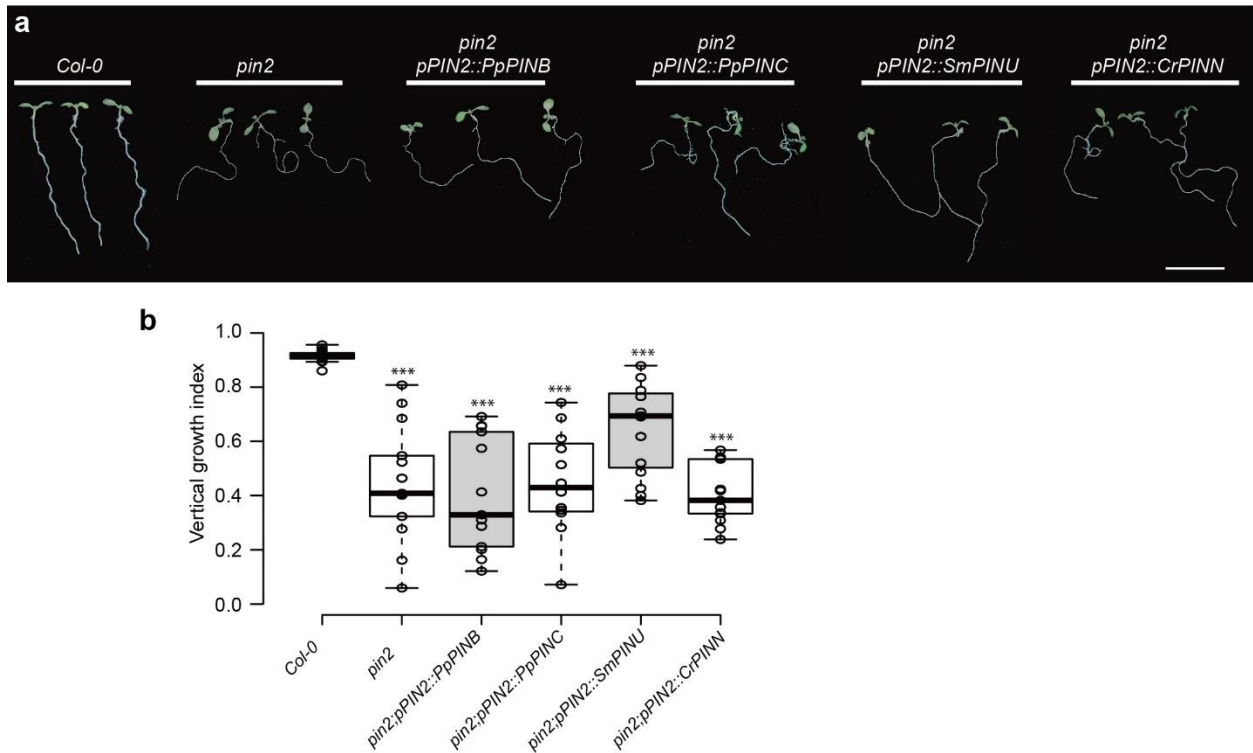

**Supplementary Figure 9. PIN2 function in root gravitropism originated in the seed plants.**

**a**, Interspecies complementation experiments showed that PpPINB, PpPINC (moss), SmPINU (lycophyte) and CrPINN (fern) failed to complement the defective root gravitropism phenotype of the *pin2* mutant. Scale bars, 1 cm. **b**, Quantification of the Vertical growth index (VGI) in **a** ( $n \geq 10$  roots). Center lines show the medians; box limits indicate the 25th and 75th percentiles as determined by R software; whiskers extend 1.5 times the interquartile range from the 25th and 75th percentiles, outliers are represented by dots. Student's *t*-test, \*\*\* denotes  $P < 0.001$ , compared with the *Col-0*, respectively. Source data are provided as a Source Data file.

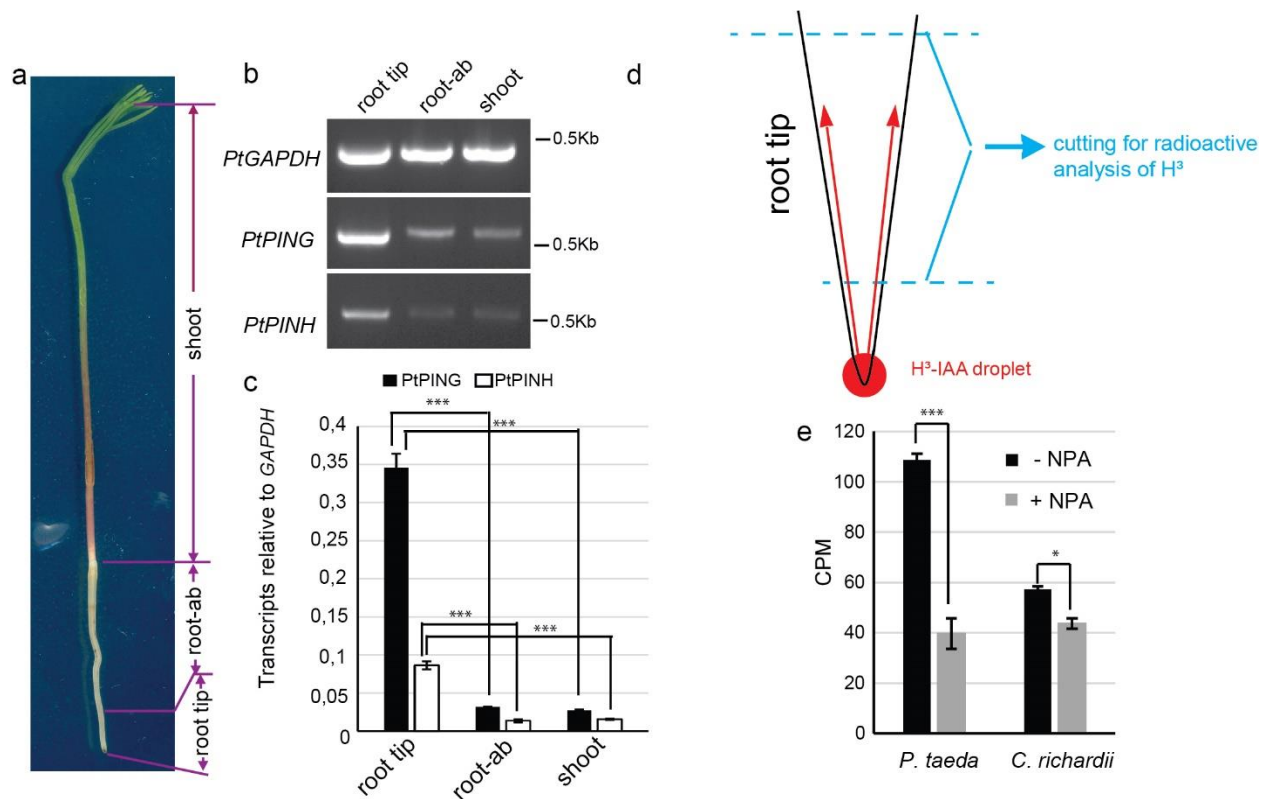

**Supplementary Figure 10. The expression of the PING/H and the shootward auxin transport assay in the root tip of *P. taeda*.** **a-c**, Reverse transcription PCR (RT-PCR) (**b**) and quantitative PCR (qPCR) (**c**) analysis of the transcriptional levels of *PtPING/H* in the root tip of *P. taeda* as compared with their transcriptional levels in shoot or in the other part of the root above the root tip (denoted by root-ab) (**a**). Constitutively expressed *PtGAPDH* was used as the internal standard for quantitative analysis. Student's *t*-test, \*\*\* denotes  $P < 0.001$ , compared with the transcription level of *PtPING/PtPINH* in the root tip, respectively. **d**, Schematic diagram showing the measurement of the shootward auxin transport by detecting the  $^3\text{H}$  labeled IAA ( $^3\text{H}$ -IAA) radioactive intensity of the cut segment of the root (above the root apex) after 6 hour treatment with a  $5 \mu\text{M}$   $^3\text{H}$ -IAA droplet in the root apex. **e**, Comparisons of shootward  $^3\text{H}$ -IAA transport efficiency with or without the treatment of  $10 \mu\text{M}$  1-naphthylphthalamic acid (NPA), an inhibitor of PIN auxin efflux activity, in both the *P. taeda* and *C. richardii* roots. Graph shows mean  $\pm$  SD from

three independent experiments. Student's *t*-test, \*, \*\*\* denotes  $P < 0.01$  or  $P < 0.001$ , compared with the seedlings without the NPA treatment. Source data are provided as a Source Data file.

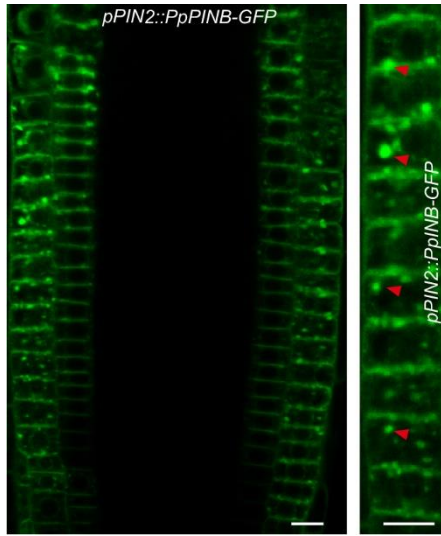

**Supplementary Figure 11. The subcellular localization of moss PpPINB expressed under the control of the *Arabidopsis* PIN2 promoter in *Arabidopsis* root epidermal cells.** The red arrows indicate aggregated PINB granules in the internal compartments of root epidermal cells. Scale bars, 10  $\mu\text{m}$ .



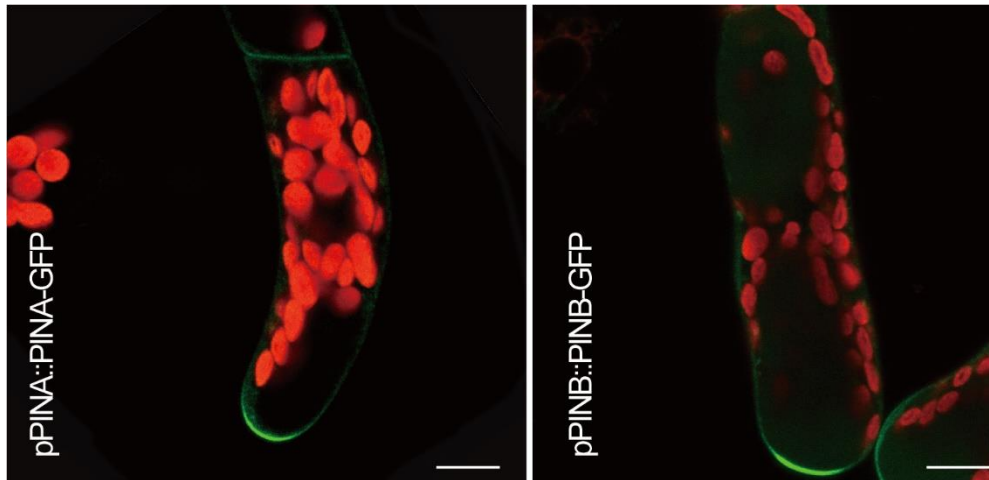

**Supplementary Figure 12. The subcellular localization of PpPINA and PpPINB in moss.**

PpPINA and PpPINB are not localized on the shootward side of rhizoid cells in moss. Scale bars, 10  $\mu\text{m}$ .

|            |        |     |                                                              |
|------------|--------|-----|--------------------------------------------------------------|
| Gymnosperm | GaPIN2 | 224 | -LNSLTSMTPRASNLTGVEIYSVQSSREPTPRASSFNQNDFYAMF-ASKAPSPKHGYNNS |
|            | AtPIN2 | 227 | -LNS-SMTTPRASNLTGVEIYSVQSSREPTPRASSFNQTFYAMFNASKAPSPRHGYTNS  |
|            | OsPIN2 | 238 | AYGASNAMTPRASNLTGVEIYSLQTSREPTPRASSFNQADFYAMFSGSKM---ASQMASP |
|            | PtPINH | 225 | -----LSLTPRPSNLSNAEIYS-----NPTPRGSSFNHADFYSLFTNRT-----AAAAAM |
|            | PaPINH | 205 | -----LSLTPRPSNLSNAEIYS-----NPTPRGSSFNHADFYSLFTNR-----AAAAAV  |
| Gymnosperm | PtPING | 226 | ---SLPSLTPRPSNLTGAEIYSLHSSRNPTPRGSSFNHTDFYSMLSGNPP----RGSSNL |
| Angiosperm | GaPIN2 | 282 | FQGA---VGDVFSLOSSKGGATPRTSNFDEEMLKVAKR-----                  |
|            | AtPIN2 | 285 | YGGAGAGPGGDVYSLQSSKGGTPRTSNFDEEVMKTAKA-----                  |
|            | OsPIN2 | 295 | --MAQHGG---AGGRAQGLDEQVIN-----                               |
| Gymnosperm | PtPINH | 270 | SPRASNFGLSDVYSLHSSRGPTPRNSNFDEENFKDINNKLMIQNANNANSPRFGPRPLYS |
|            | PaPINH | 249 | SPRQSNFGHSDVYSLHSSRGPTPRNSNFDEENFKDMNNKLMIQSTNNANSPRFGPRPLYS |
|            | PtPING | 279 | SPRHSNFQSTDVYSMNSSRGPTPRTSNFDEEVSKDVK-----GSNHGRFGYSGGVA     |

**Supplementary Figure 13. The evolutionary conservation of the phosphorylation sites in both the angiosperm PIN2 proteins and gymnosperm PINH/G.** The amino acid sequence alignment of the gymnosperm PINH/G and angiosperm PIN2 in the phosphorylation site-spanning region reported by the Dhonukshe *et al*<sup>7</sup>, which are critical for the PIN2 function in mediating root gravitropism.

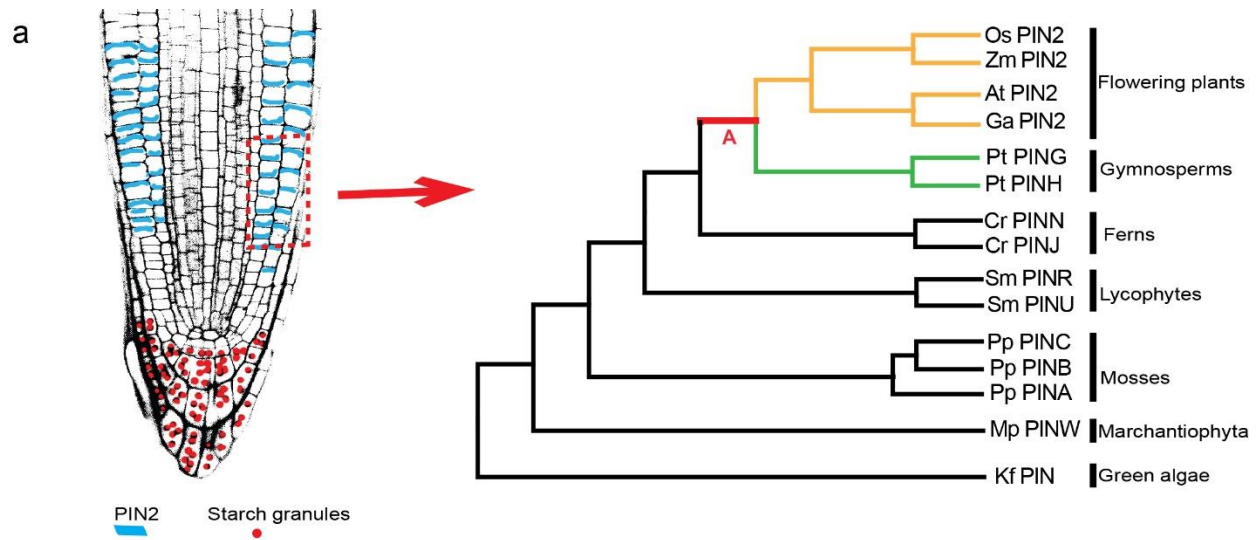

**b**

| Models                         | Estimates of parameters                                              | Models compared | P values        |
|--------------------------------|----------------------------------------------------------------------|-----------------|-----------------|
| <b><i>PIN</i> gene dataset</b> |                                                                      |                 |                 |
| A. Branch-site null Model A    | $\omega_0=0.07089, \omega_1=1, \omega_2=1$                           |                 |                 |
| B. Branch-site Model A         | $\omega_0=0.06971, \omega_1=1, \omega_2=999$                         | B vs. A         | 0.0016* (<0.01) |
| C. Three-ratio Model           | $\omega_0=0.05769, \omega_1=999, \omega_2=0.09591$                   |                 |                 |
| D. Four-ratio Model            | $\omega_0=0.05771, \omega_1=999, \omega_2=0.09095, \omega_3=0.09730$ | D vs. C         | 0.9993 (>0.05)  |

\* Significant difference between Model B and Model A.

**Supplementary Figure 14. Evolution of PIN2 was driven by positive natural selection. a,**

Phylogeny of *PIN* genes. Left, The schematic drawing of root tip of an *Arabidopsis* seedling.

*PIN2* expression is indicated by blue lines and starch granule accumulation is indicated by red

dots. Right, Phylogenetic tree of *PIN* proteins from representative plant species. The plant

lineages are labeled on the right. **b,** We constrained the branch ancestral to *PIN2* and *PINH/G*

(branch A shown in red in Supplementary Fig. 14a) as the foreground and tested branch-site

models. In the branch-site null model A (null hypothesis),  $\omega_2$  for branch A was fixed at 1 (no

natural selection), whereas in the branch-site model A (alternative hypothesis), the  $\omega_2$  for

branch A was estimated, and it greatly exceeds 1 ( $\omega_2 = 999 > 1$ ; positive selection). A likelihood

ratio test between the two models (alternative hypothesis vs. null hypothesis) was significant ( $P$

= 0.0016 < 0.01) and strongly support the alternative hypothesis, suggesting that positive

selection probably increased the evolutionary rate of the *PIN2* and *PINH/G* genes in seed plants

after their separation from the fern lineages. Thus, positive selection may have played an important role in the functional innovations of the *PIN2* and *PINH/G* genes. Then we tested the possibility of differential selection of the *PINH/G* genes in gymnosperms and *PIN2* genes in flowering plants by comparing a three-ratio model with a four-ratio model. In the three-ratio model, three  $\omega$  values are assumed:  $\omega_1$  for branch A (red, *PIN2* and *PINH/G* in seed plants) ,  $\omega_2$  was fixed the same for branch in green (*PINH/G* in gymnosperms) and also for branch in yellow (*PIN2* in flowering plants), and  $\omega_0$  for all other branches, whereas in the four-ratio model one additional  $\omega$ ,  $\omega_3$ , is assumed for *PIN2* genes (yellow branches), and  $\omega_2$  is assumed for *PINH/G* genes (green branches) (Supplementary Fig. 14a). Both  $\omega_2$  (0.09095) and  $\omega_3$  (0.09730) estimated by the four-ratio model are less than 1, strongly indicative of purifying selection acting on both *PIN2* and *PINH/G* genes. A likelihood ratio test between the two models was not significant ( $P=0.9993 >0.05$ ), suggesting similar levels of purifying selection on the *PIN2* gene in flowering plants and the *PINH/G* genes in gymnosperms.

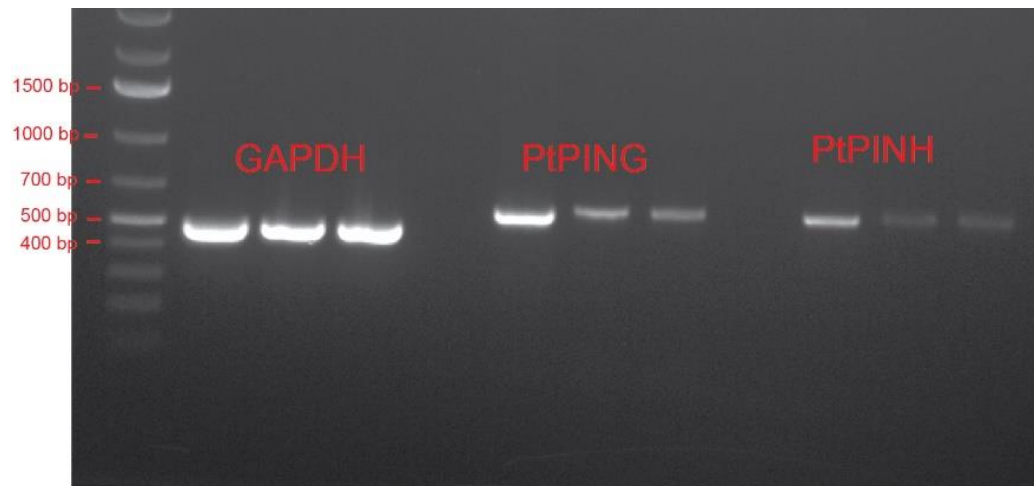

**Supplementary Figure 15. Full scan of uncropped gel for Supplementary Fig. 10b.**

**Supplementary Table 1** | Accession numbers or IDs of *PIN* genes

| Protein         | Accession no./ID                             | Protein           | Accession no./ID  |
|-----------------|----------------------------------------------|-------------------|-------------------|
| MpPINZ          | Mapoly0089s0050.1                            | SmPINV            | 119024            |
| MpPINX          | Mapoly0027s0111.1                            | SmPINU $\beta$    | 231064            |
| MpPINY          | Mapoly0027s0108.1                            | SmPINU $\alpha$   | 268490            |
| MpPINW          | Mapoly0053s0108.1                            | SmPINS            | 234325            |
| CfPINM $\alpha$ | scaffold-LHLE-2007361                        | ZmPIN2            | AQL05162.1        |
| CfPINM $\beta$  | scaffold-LHLE-2016421                        | ZmPIN1a           | GRMZM2G149184_T01 |
| CfPINK $\alpha$ | scaffold-LHLE-2003173                        | ZmPIN1b- $\alpha$ | GRMZM2G149184_T01 |
| CfPINK $\beta$  | scaffold-LHLE-2003174                        | ZmPIN1b- $\beta$  | GRMZM2G098643_T01 |
| CfPINJ          | scaffold-LHLE-2011490                        | ZmPIN10a          | GRMZM2G126260_T02 |
| PaPINE          | lcl MA_100472g0010                           | ZmPIN10b          | GRMZM2G160496_T01 |
| PaPINH          | lcl MA_69724g0010                            | ZmPIN11           | GRMZM2G171702_T01 |
| PaPING          | lcl MA_61553g0010                            | ZmPIN5a- $\alpha$ | GRMZM2G025742_T01 |
| PaPINF          | lcl MA_10258002g0010                         | ZmPIN5a- $\beta$  | GRMZM2G175983_T01 |
| PtPINE          | lcl PITA_000003882                           | ZmPIN5b           | GRMZM2G040911_T01 |
| PtPINH          | lcl PITA_000024726                           | ZmPIN5c           | GRMZM2G148648_T01 |
| PtPING          | lcl PITA_000013100                           | ZmPIN8            | GRMZM5G839411_T02 |
| PtPINF          | lcl PITA_000046447                           | ZmPIN9            | GRMZM5G859099_T01 |
| PtPINI          | lcl PITA_000012975                           | OsPIN1b           | XP_015627099.1    |
| AmtPIN1         | lcl evm_27.model.AmTr_v1.0_scaffold00010.98  | OsPIN1a           | XP_015641301.1    |
| AmtPIN3         | lcl evm_27.model.AmTr_v1.0_scaffold00024.330 | OsPIN10a          | XP_015625677.1    |
| AmtPIN11        | lcl evm_27.model.AmTr_v1.0_scaffold00101.123 | OsPIN11a          | XP_015616014.1    |
| AmtPIN2         | lcl evm_27.model.AmTr_v1.0_scaffold00019.408 | OsPIN11b          | XP_015619425.1    |
| AmtPIN12        | lcl evm_27.model.AmTr_v1.0_scaffold00013.203 | OsPIN2            | XP_015641653.1    |
| AmtPIN8-1       | lcl evm_27.model.AmTr_v1.0_scaffold00038.32  | OsPIN10b          | XP_015638890.1    |
| AmtPIN8-2       | lcl evm_27.model.AmTr_v1.0_scaffold00038.35  | OsPIN8            | XP_015649668.1    |
| AmtPIN5         | lcl evm_27.model.AmTr_v1.0_scaffold00013.199 | OsPIN5b           | XP_015649102.1    |
| AmtPIN8-3       | lcl evm_27.model.AmTr_v1.0_scaffold00038.38  | OsPIN5c           | XP_015611661.1    |

|        |        |         |                |
|--------|--------|---------|----------------|
| SmPINR | 99301  | OsPIN5a | XP_015621857.1 |
| SmPINT | 102666 | OsPIN9  | XP_015634219.1 |

Mp: *Marchantia polymorpha*

Cf: *Cystopteris fragilis*

Pa: *Picea abies*

Pt: *Pinus taeda*

Sm: *Selaginella moellendorffii*

Amt: *Amborella trichopoda*

Zm: *Zea Mays*

Os: *Oryza sativa*
