# Supplementary material for: Evolution of fast root gravitropism in seed plants
Source: PubMed Central journal article supplement (PMC6677796; doi:10.1038/s41467-019-11471-8), 2019-08-02
Supplement: 41467_2019_11471_MOESM3_ESM.pdf [file 41467_2019_11471_MOESM3_ESM.pdf]

## **Description of Additional Supplementary Files**

File Name: Supplementary Data 1

Description: Primers used for vector construction
